# Supplementary material
Source: ML conference proceedings conference paper supplement (https://proceedings.mlr.press/v48/gonen16.html)
Supplement: Supplementary file [file gonen16-supp.pdf]

---

# Supplement: Solving Ridge Regression using Sketched Preconditioned SVRG

---

**Alon Gonen**

The Hebrew University

ALONGNN@CS.HUJI.AC.IL

**Francesco Orabona**

Yahoo Research, 229 West 43rd Street, 10036 New York, NY, USA

FRANCESCO@ORABONA.COM

**Shai Shalev-Shwartz**

The Hebrew University

SHAIS@CS.HUJI.AC.IL

## 1. Omitted Proofs

*Proof. (of Theorem 4)* We first show that the average smoothness of  $\tilde{L}$  is bounded by

$$\frac{1}{n+d} \sum_{i=1}^{n+d} \tilde{\beta}_i \leq \text{tr} \left( P^{-1/2} (C + \lambda I) P^{-1/2} \right). \quad (1)$$

Note that for any  $w$ ,

$$\nabla^2 \tilde{\ell}_i(w) = \begin{cases} \frac{n+d}{n} \tilde{x}_i \tilde{x}_i^\top & 1 \leq i \leq n, \\ \lambda(n+d) b_{i-n} b_{i-n}^\top & n < i \leq n+d. \end{cases}$$

Therefore, using the fact that the spectral norm of a rank-1 psd matrix is equal to its trace, we obtain

$$\begin{aligned} \frac{1}{n+d} \sum_{i=1}^n \tilde{\beta}_i &= \frac{1}{n+d} \frac{n+d}{n} \sum_{i=1}^n \|\tilde{x}_i \tilde{x}_i^\top\| + \frac{1}{n+d} \lambda(n+d) \sum_{j=1}^d \|b_j b_j^\top\| \\ &= \frac{1}{n} \sum_{i=1}^n \text{tr}(\tilde{x}_i \tilde{x}_i^\top) + \lambda \sum_{j=1}^d \text{tr}(b_j b_j^\top) \\ &= \frac{1}{n} \text{tr} \left( \sum_{i=1}^n P^{-1/2} x_i x_i^\top P^{-1/2} \right) + \lambda \text{tr} \sum_{j=1}^d (P^{-1/2} e_j e_j^\top P^{-1/2}) \\ &= \text{tr} (P^{-1/2} (C + \lambda I) P^{-1/2}). \end{aligned}$$

Hence, we deduce (1).

We will conclude the theorem by showing that  $\tilde{L}$  is  $\lambda_d(P^{-1/2}(C + \lambda I)P^{-1/2})$ -strongly convex. Indeed, a similar calculation shows that the Hessian of  $L$  at any point  $w$  is given by

$$\nabla^2 \tilde{L}(w) = P^{-1/2} (C + \lambda I) P^{-1/2}.$$

Hence, we conclude the claimed bound.  $\square$
